# Supplementary material
Source: PubMed Central journal article supplement (PMC6445669)
Supplement: NIHMS1519611-supplement-4.pdf [file NIHMS1519611-supplement-4.pdf]

## Supplementary Fig. S5

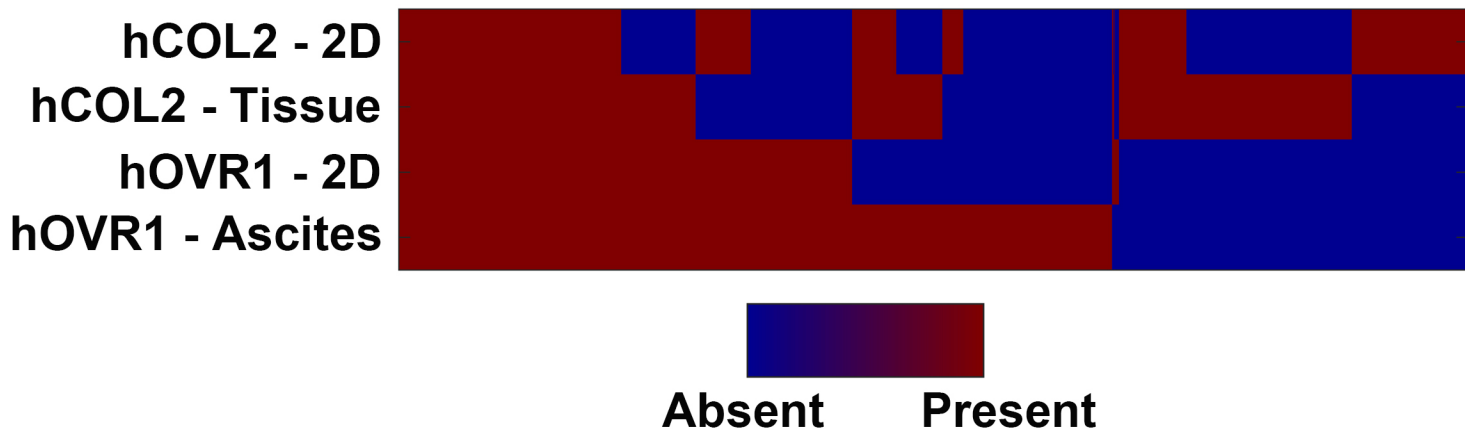

**Supplementary Table S3**

|              | <b># variants in cultured cells</b> | <b># common variants between cultured cells and patient tissue</b> | <b>% variants common between cultured cells and patient tissue</b> |
|--------------|-------------------------------------|--------------------------------------------------------------------|--------------------------------------------------------------------|
| <b>hCOL2</b> | <b>97,977</b>                       | <b>63,643</b>                                                      | <b>64.96</b>                                                       |
| <b>hOVR1</b> | <b>85,520</b>                       | <b>84,159</b>                                                      | <b>98.41</b>                                                       |
