# Supplementary material
Source: PubMed Central journal article supplement (PMC6445669)
Supplement: NIHMS1519611-supplement-5.pdf [file NIHMS1519611-supplement-5.pdf]

A

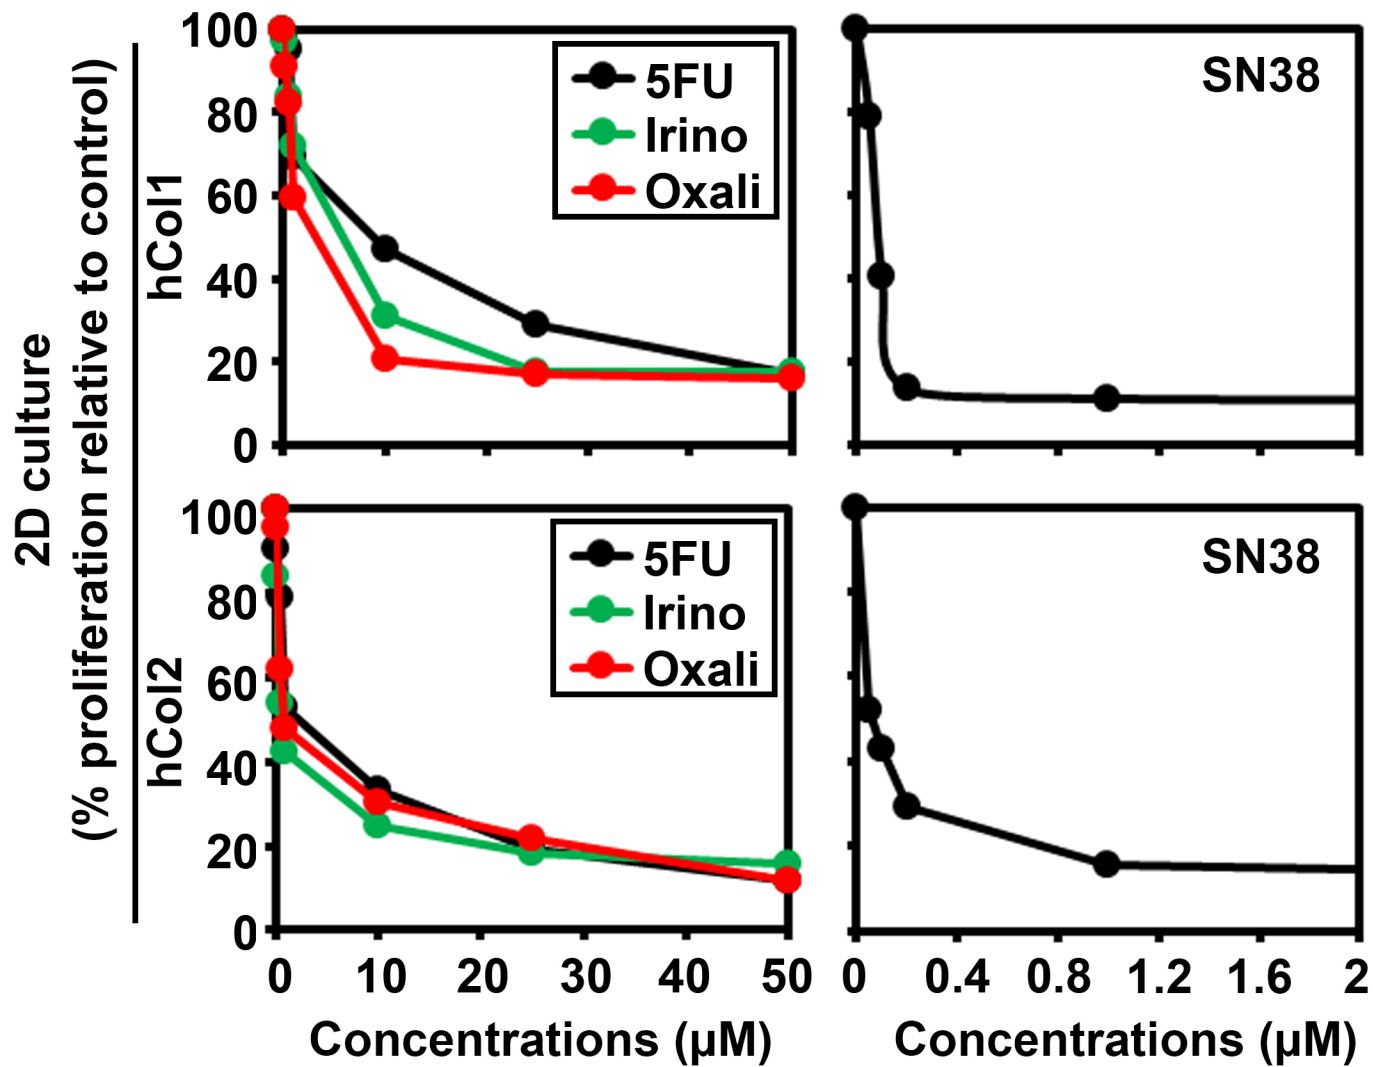

# Supplementary Fig. S6

B

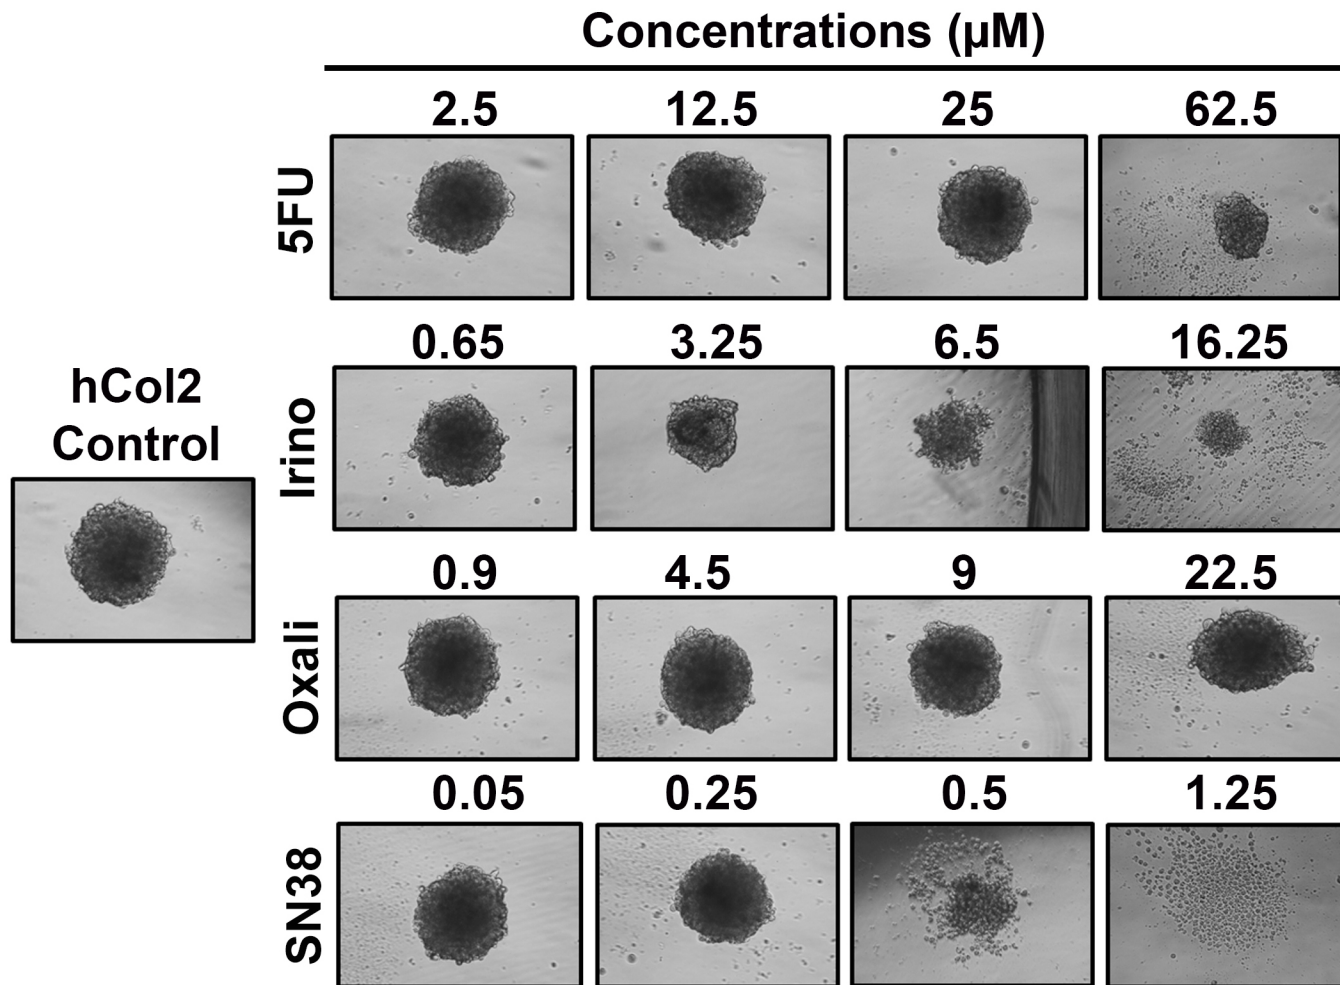

A

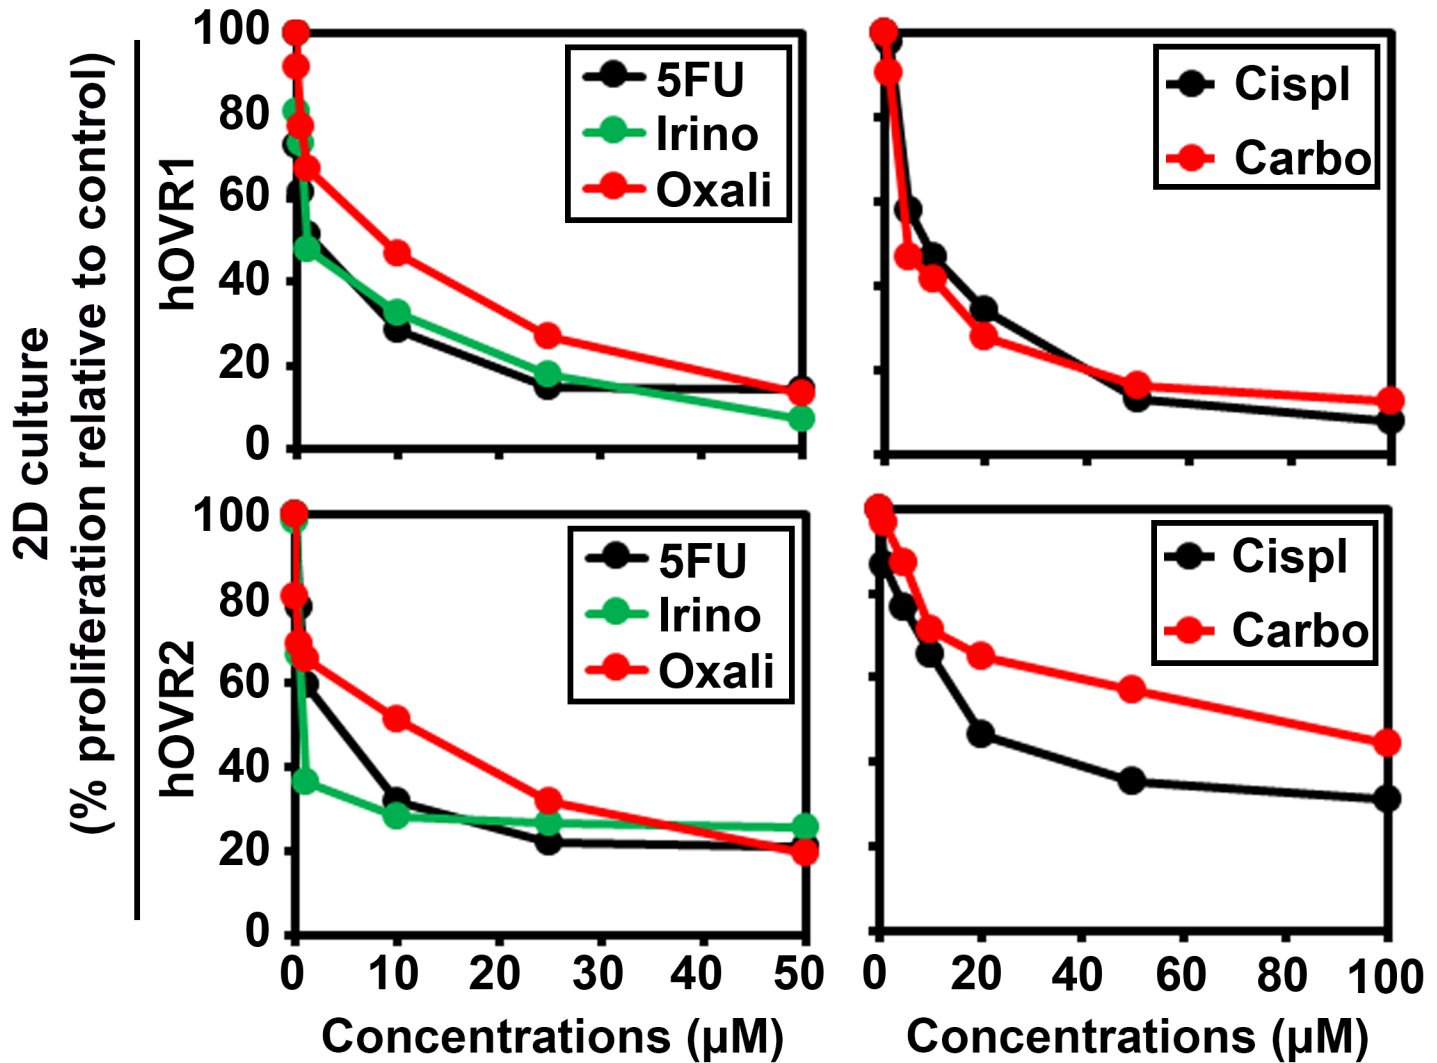

B

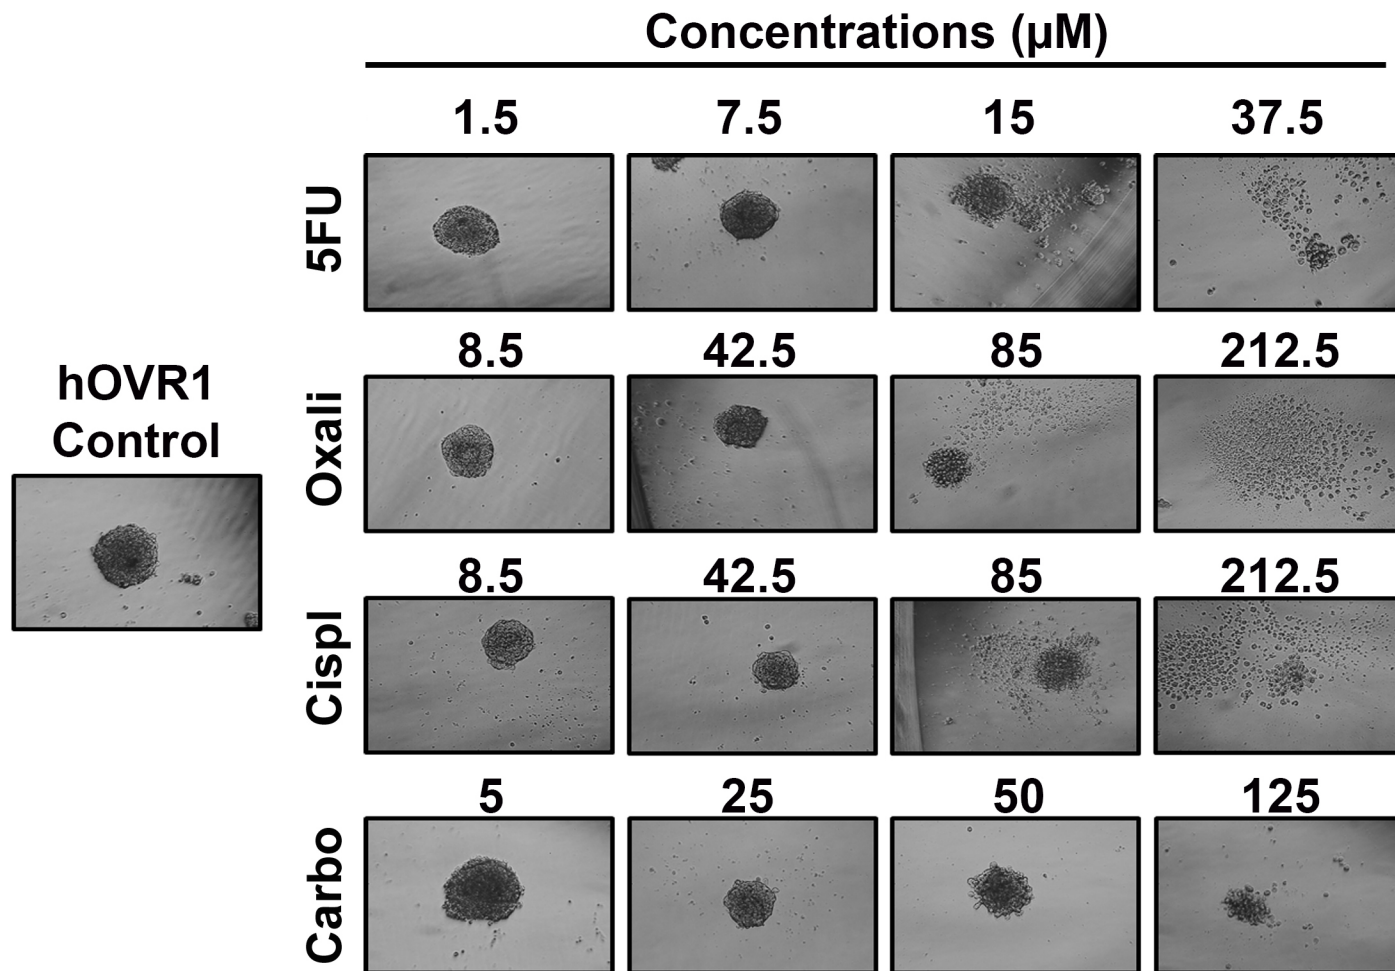

C

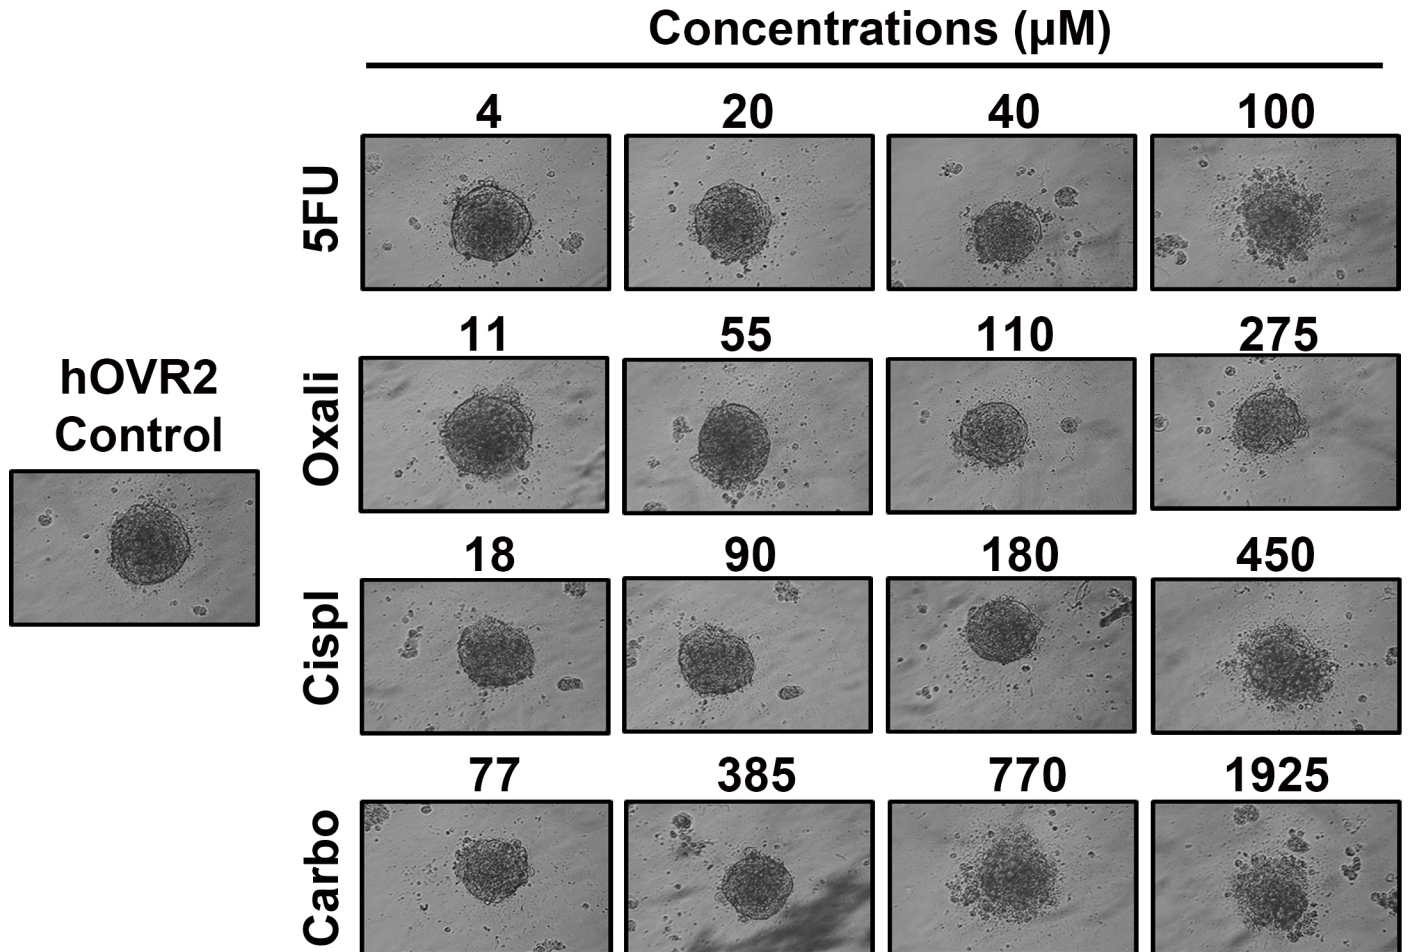

**Supplementary Table S4**

| <b>IC50 (<math>\mu</math>M)<br/><math>\pm</math>SD</b> | <b>hCol1</b>                      |                                    | <b>hCol2</b>                      |                                   |
|--------------------------------------------------------|-----------------------------------|------------------------------------|-----------------------------------|-----------------------------------|
|                                                        | <b>TiD</b>                        | <b>2D</b>                          | <b>TiD</b>                        | <b>2D</b>                         |
| <b>5FU</b>                                             | <b>&gt;25</b>                     | <b><math>9 \pm 1.12</math></b>     | <b><math>3.25 \pm 0.5</math></b>  | <b><math>2.5 \pm 0.78</math></b>  |
| <b>Irinotecan</b>                                      | <b>&gt;25</b>                     | <b><math>5.75 \pm 0.9</math></b>   | <b><math>0.3 \pm 0.07</math></b>  | <b><math>0.65 \pm 0.1</math></b>  |
| <b>Oxaliplatin</b>                                     | <b>&gt;25</b>                     | <b><math>3.25 \pm 1.25</math></b>  | <b>&gt;25</b>                     | <b><math>0.9 \pm 0.43</math></b>  |
| <b>SN38</b>                                            | <b><math>0.45 \pm 0.19</math></b> | <b><math>0.08 \pm 0.005</math></b> | <b><math>0.07 \pm 0.01</math></b> | <b><math>0.05 \pm 0.01</math></b> |

# Supplementary Table S5

| IC50 ( $\mu\text{M}$ )<br>$\pm$ SD | hOVR1            |               | hOVR2            |                |
|------------------------------------|------------------|---------------|------------------|----------------|
|                                    | TiD              | 2D            | TiD              | 2D             |
| 5FU                                | $10 \pm 1.73$    | $1.5 \pm 0.5$ | $3.5 \pm 0.52$   | $4 \pm 0.38$   |
| Irinotecan                         | $4 \pm 0.8$      | $1 \pm 0.21$  | $15.75 \pm 3.78$ | $1 \pm 0.15$   |
| Oxaliplatin                        | $4.25 \pm 0.25$  | $8.5 \pm 1$   | >100             | $11 \pm 0.3$   |
| Cisplatin                          | $10.25 \pm 3.19$ | $8.5 \pm 1.3$ | >100             | $18 \pm 1.75$  |
| Carboplatin                        | $30 \pm 3.22$    | $5 \pm 0.721$ | >100             | $77 \pm 10.64$ |
