# Supplementary material
Source: PubMed Central journal article supplement (PMC6445669)
Supplement: NIHMS1519611-supplement-6.pdf [file NIHMS1519611-supplement-6.pdf]

## Supplementary Table S1

| Patient No. | Sample identifier | Gender/ Age | Origin | Histology      | TNM classification | Stage |
|-------------|-------------------|-------------|--------|----------------|--------------------|-------|
| 1           | hCol1             | Female, 75  | Cecum  | Adenocarcinoma | pT2N0Mx            | -     |
| 2           | hCol2             | Male, 42    | Cecum  | -              | pT4aN2aM1b         | IVB   |
| 3           | hOVR1             | Female, 56  | Ovary  | Adenocarcinoma | -                  | IIIC  |
| 4           | hOVR2             | Female, 38  | Ovary  | Adenocarcinoma | TxN0Mx             | IC    |
