# Supplementary material
Source: PubMed Central journal article supplement (PMC6445669)
Supplement: NIHMS1519611-supplement-7.pdf [file NIHMS1519611-supplement-7.pdf]

Supplementary Table S2A,B

**A**

| IC50 ( $\mu\text{M}$ )<br>$\pm$ SD | TiD              |                 |                 |
|------------------------------------|------------------|-----------------|-----------------|
|                                    | HCT116           | SW480           | DLD1            |
| 5FU                                | >25              | $2.5 \pm 0.5$   | $0.5 \pm 0.1$   |
| Oxaliplatin                        | $0.2 \pm 0.05$   | $0.25 \pm 0.07$ | <25             |
| Irinotecan                         | $0.25 \pm 0.07$  | $3.0 \pm 0.5$   | $3 \pm 0.6$     |
| SN38                               | $0.06 \pm 0.005$ | $0.1 \pm 0.03$  | $0.16 \pm 0.06$ |

**B**

| IC50 ( $\mu\text{M}$ )<br>$\pm$ SD | 2D              |                  |                  |
|------------------------------------|-----------------|------------------|------------------|
|                                    | HCT116          | SW480            | DLD1             |
| 5FU                                | $13.2 \pm 2.08$ | $14.75 \pm 1.75$ | $16.25 \pm 1.87$ |
| Oxaliplatin                        | $3.63 \pm 0.12$ | $6.6 \pm 2.25$   | $7.4 \pm 3.05$   |
| Irinotecan                         | $11.4 \pm 0.85$ | $4.4 \pm 0.5$    | $15.1 \pm 1.8$   |
| SN38                               | $0.07 \pm 0.01$ | $0.09 \pm 0.02$  | $0.04 \pm 0.01$  |

Supplementary Table S2C,D

**C**

| IC50 (μM)<br>±SD | TiD        |             |
|------------------|------------|-------------|
|                  | A2780      | A2780 C30   |
| 5FU              | 33.1 ± 6.1 | 81.73 ± 9.1 |
| Cisplatin        | 24.6 ± 6.5 | >100        |
| Oxaliplatin      | 45.3 ± 6   | >100        |
| Carboplatin      | 53.2 ± 8   | >100        |

**D**

| IC50 (μM)<br>±SD | 2D         |            |
|------------------|------------|------------|
|                  | A2780      | A2780 C30  |
| 5FU              | 16.3 ± 0.8 | 43.3 ± 5   |
| Cisplatin        | 9.9 ± 2.1  | 63.9 ± 10  |
| Oxaliplatin      | 6.1 ± 1.4  | 44.0 ± 6.2 |
| Carboplatin      | 75.3 ± 9.6 | >200       |
