# Supplementary material
Source: PubMed Central journal article supplement (PMC6445669)

# Supplementary Fig. S1

**A**

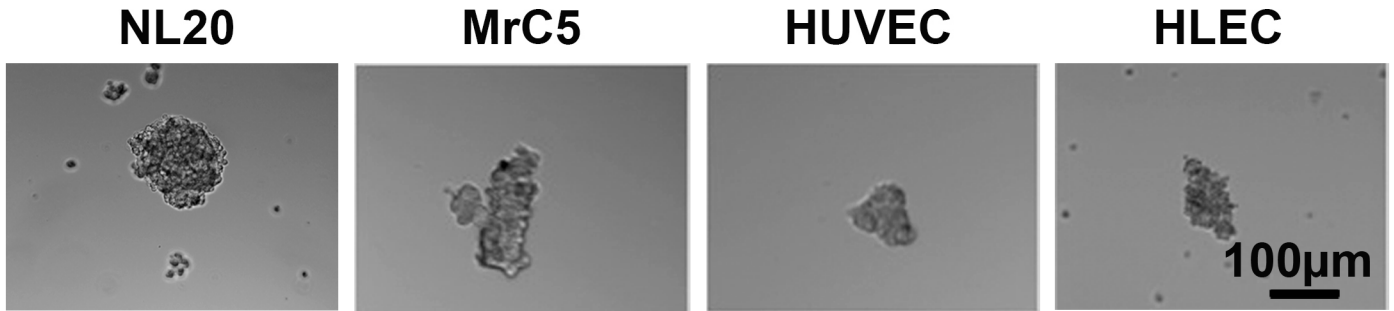

**B**

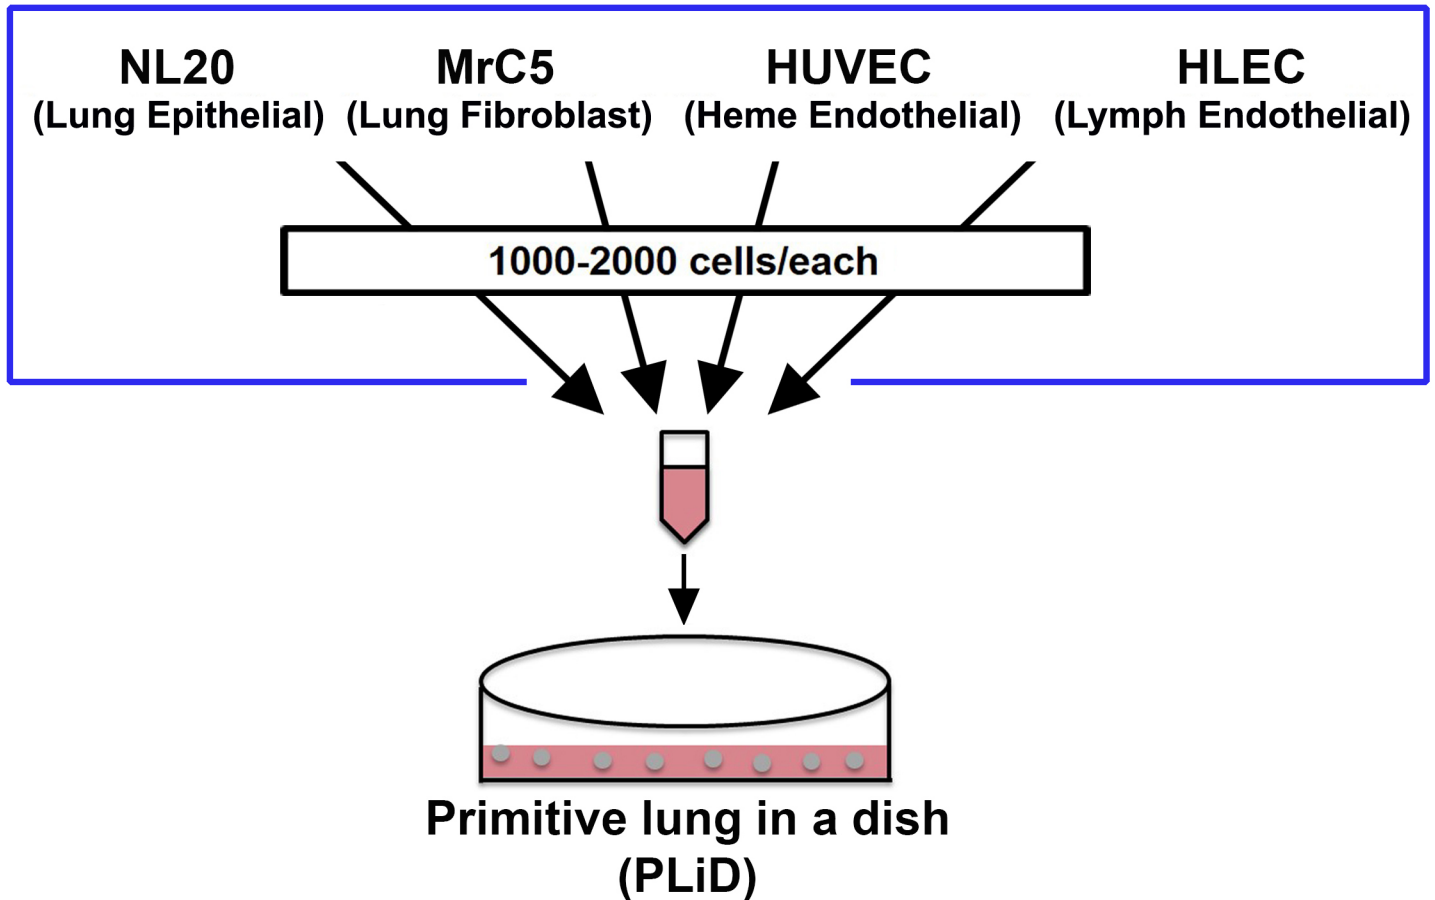

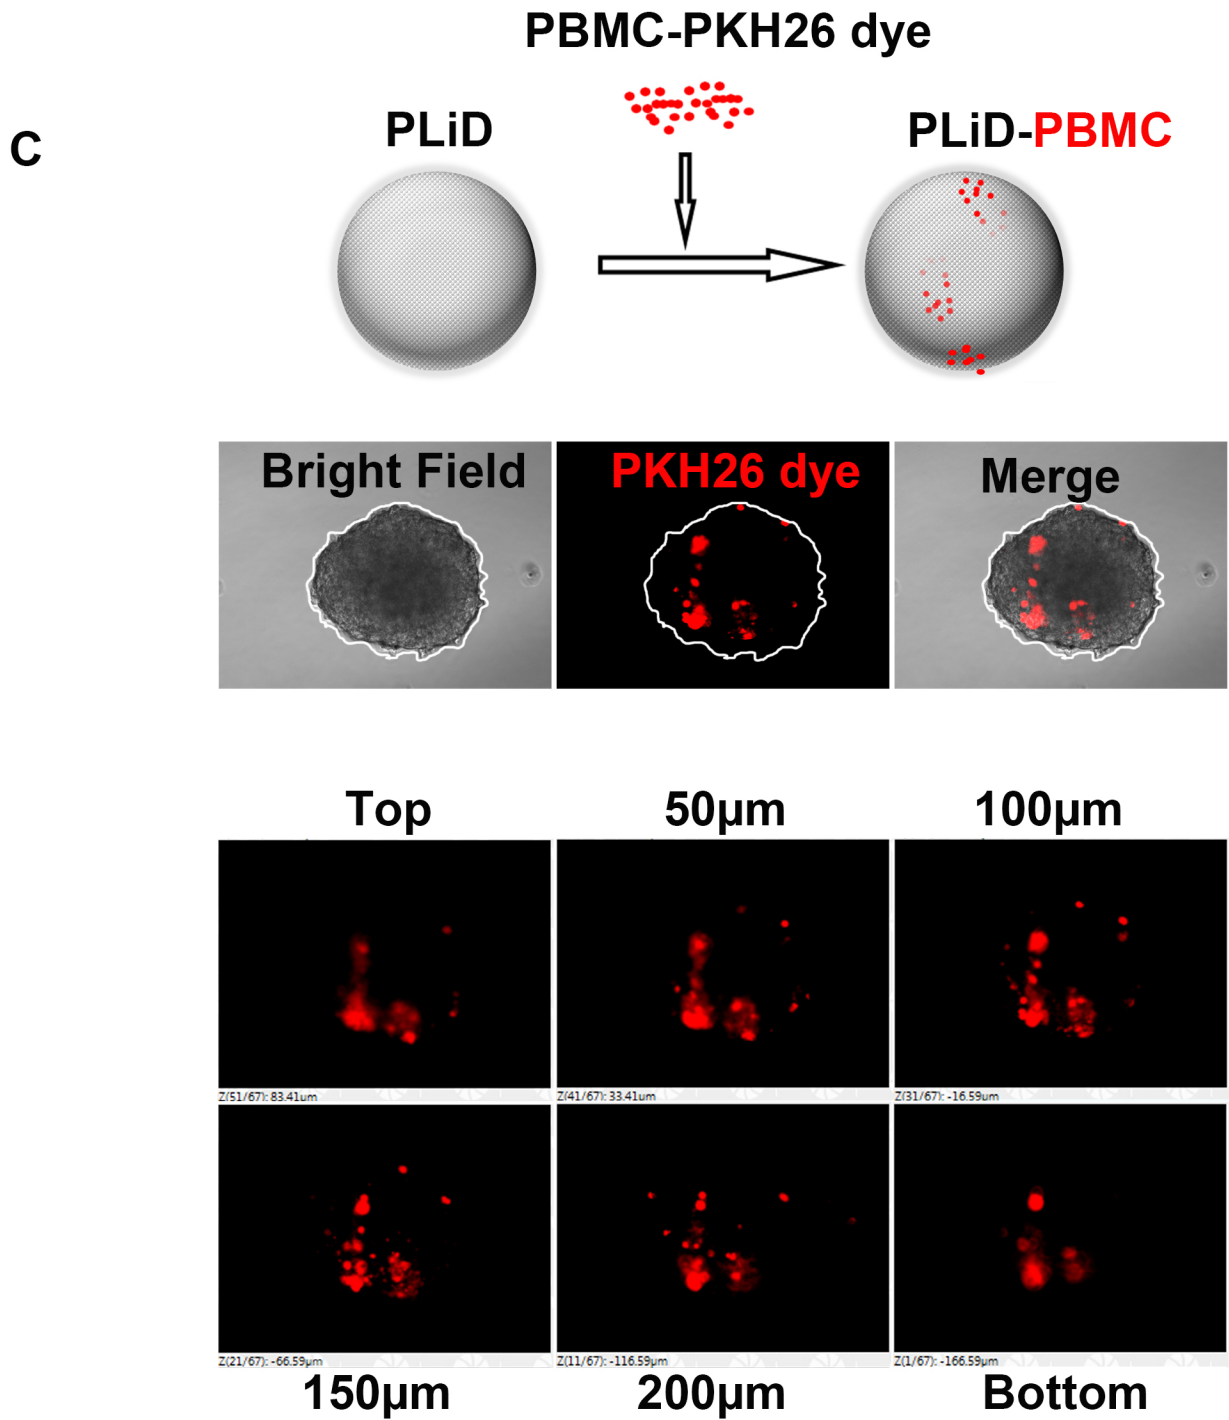

Supplementary Fig. S1

D

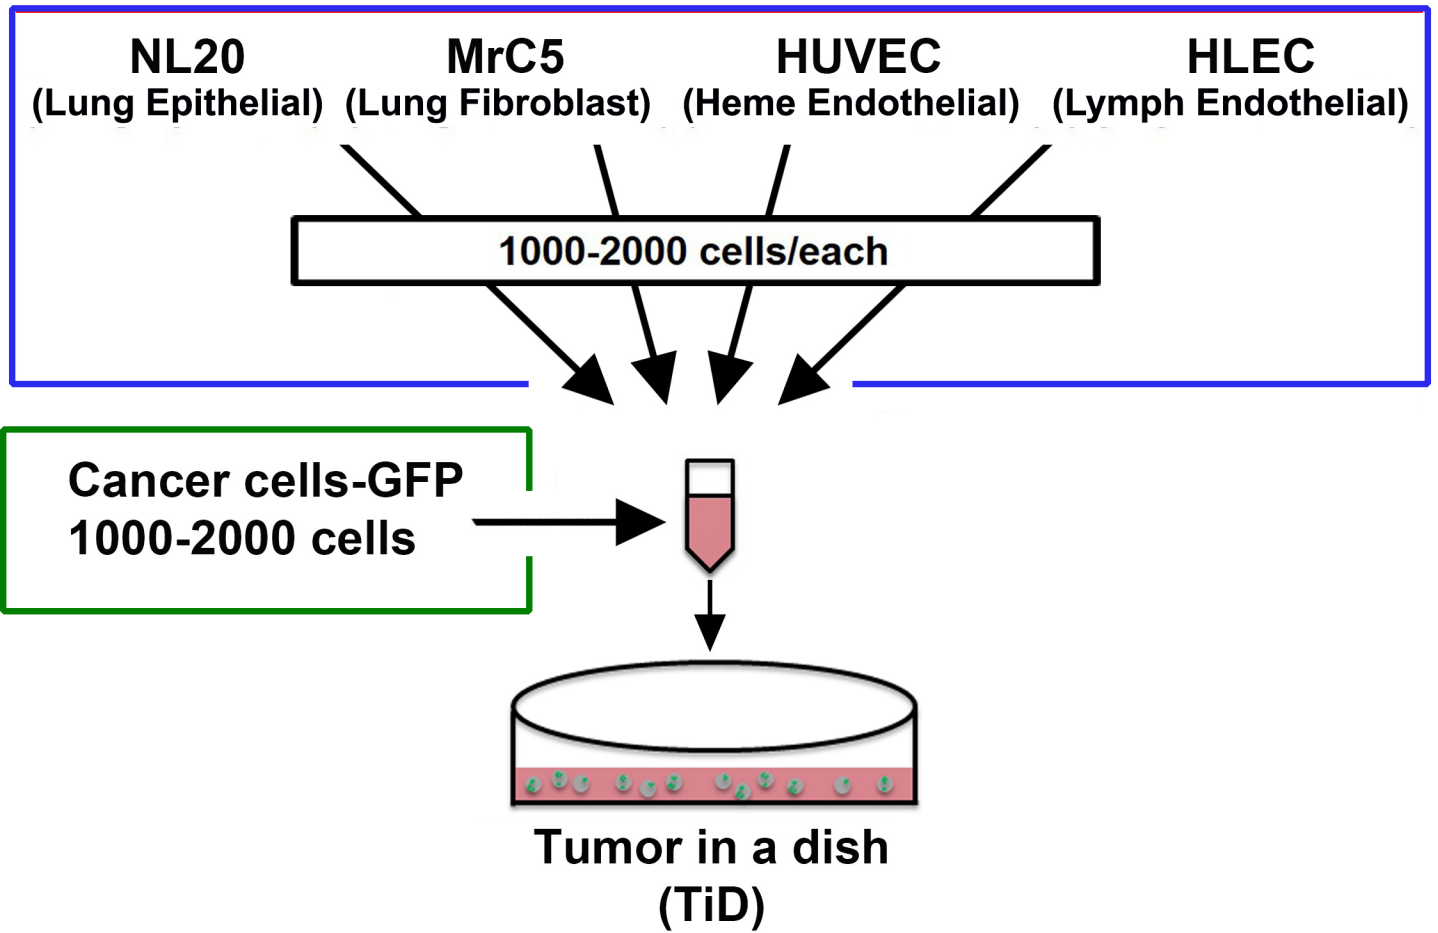

Supplement: NIHMS1519611-supplement-1.pdf [file NIHMS1519611-supplement-1.pdf]

PLiD  
Control, untreated

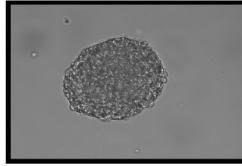

Concentrations ( $\mu\text{M}$ )

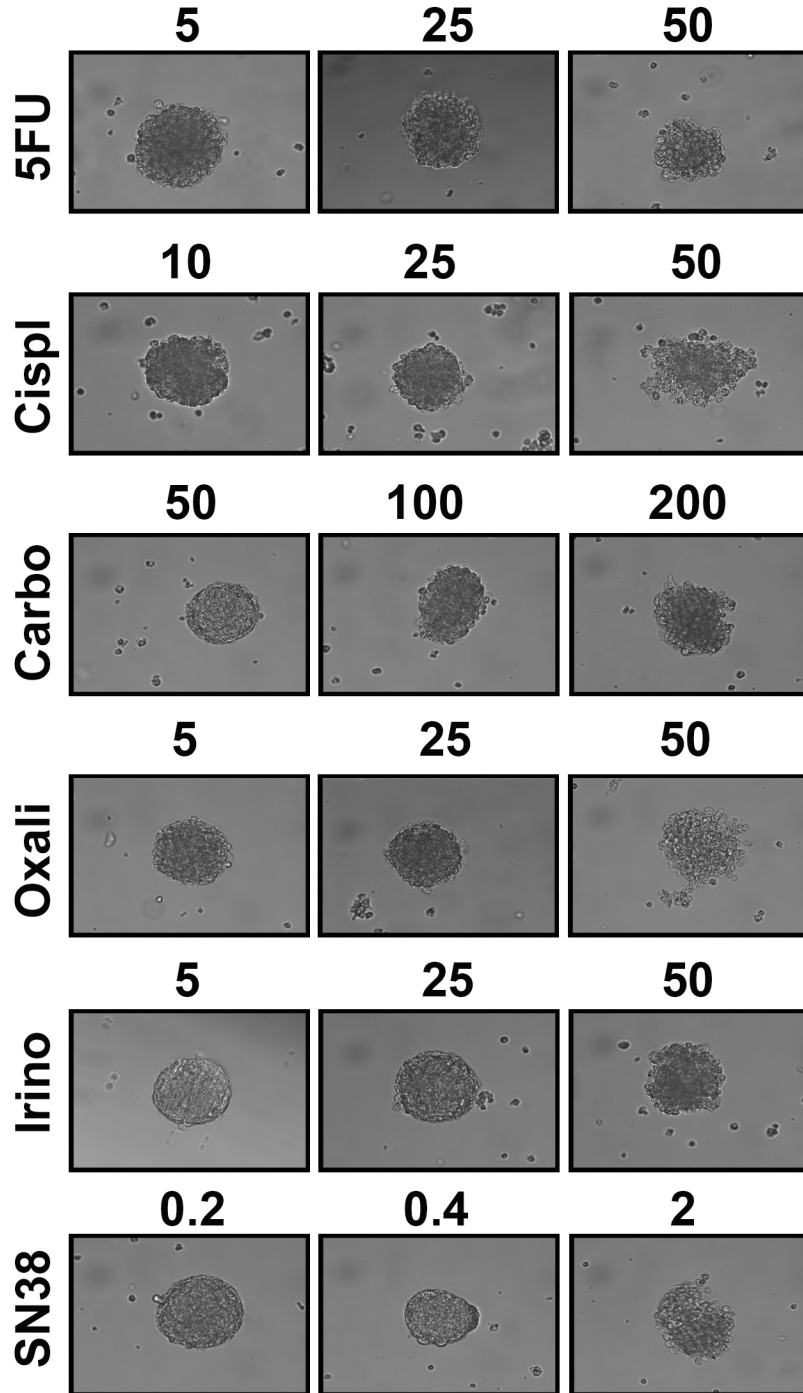

Supplementary Fig. S3

A

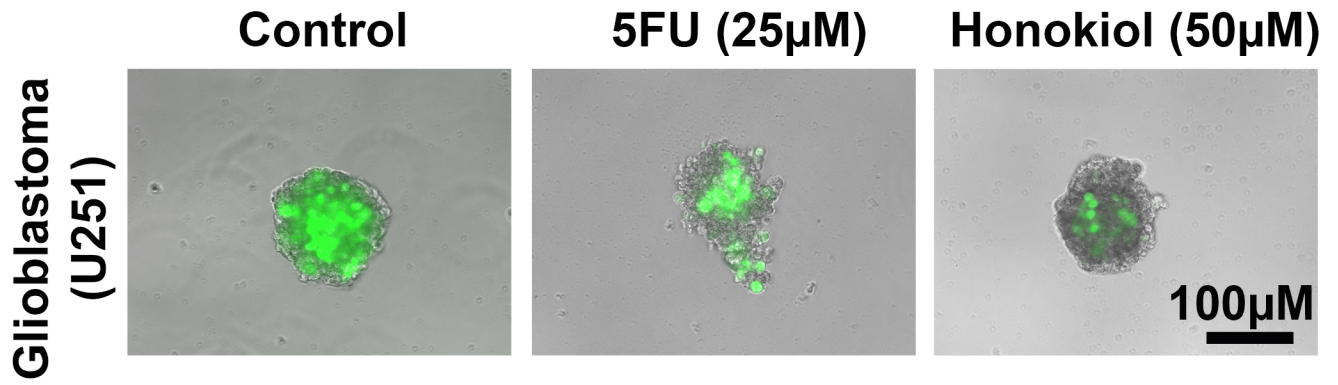

B

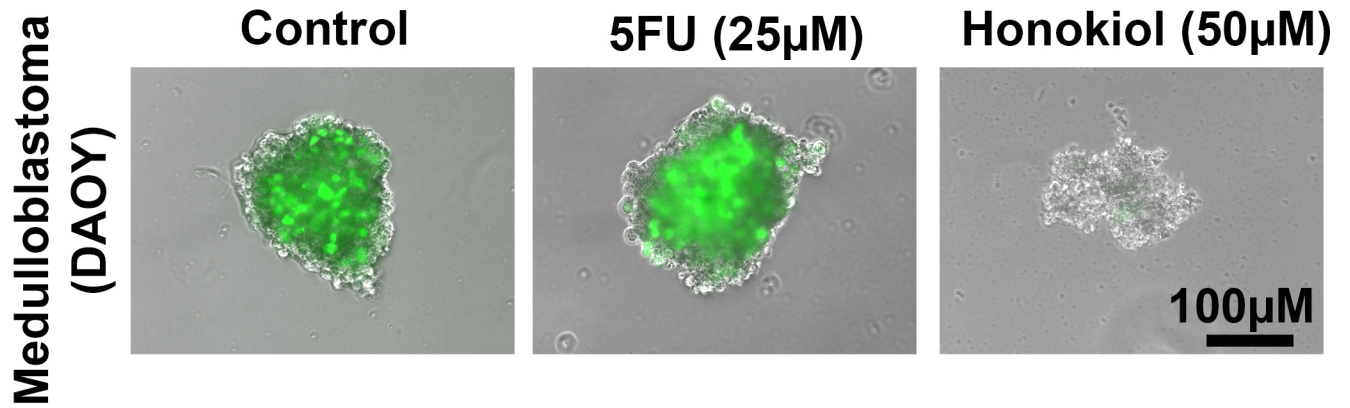

C

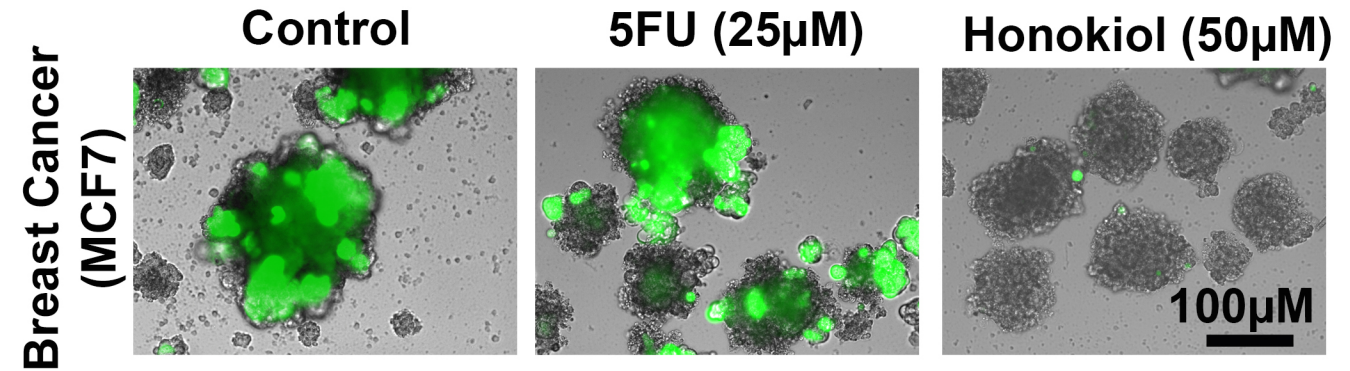

D

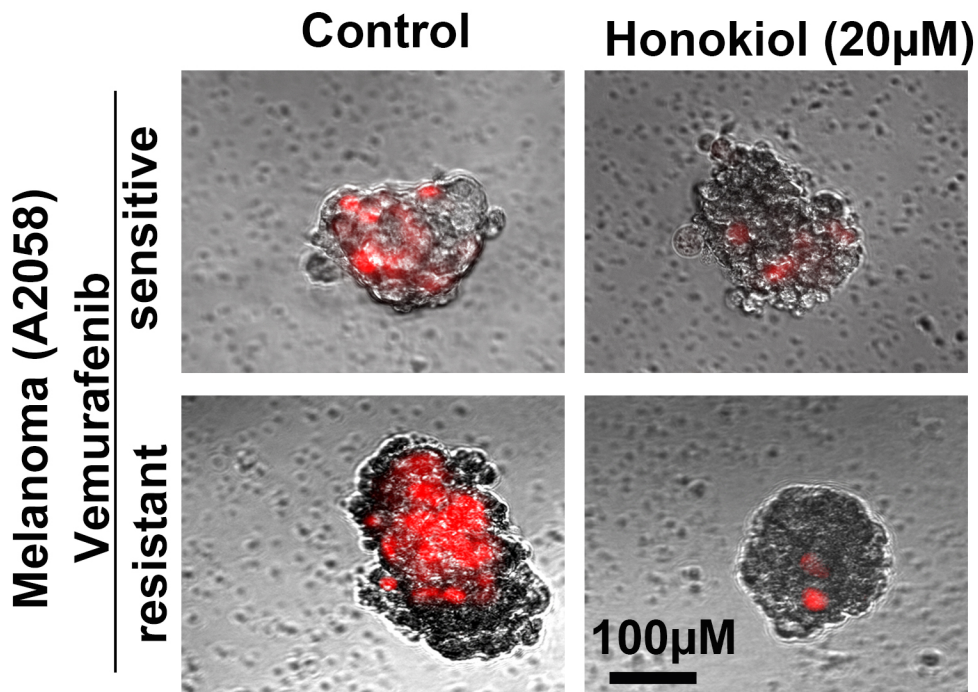

Supplement: NIHMS1519611-supplement-2.pdf [file NIHMS1519611-supplement-2.pdf]

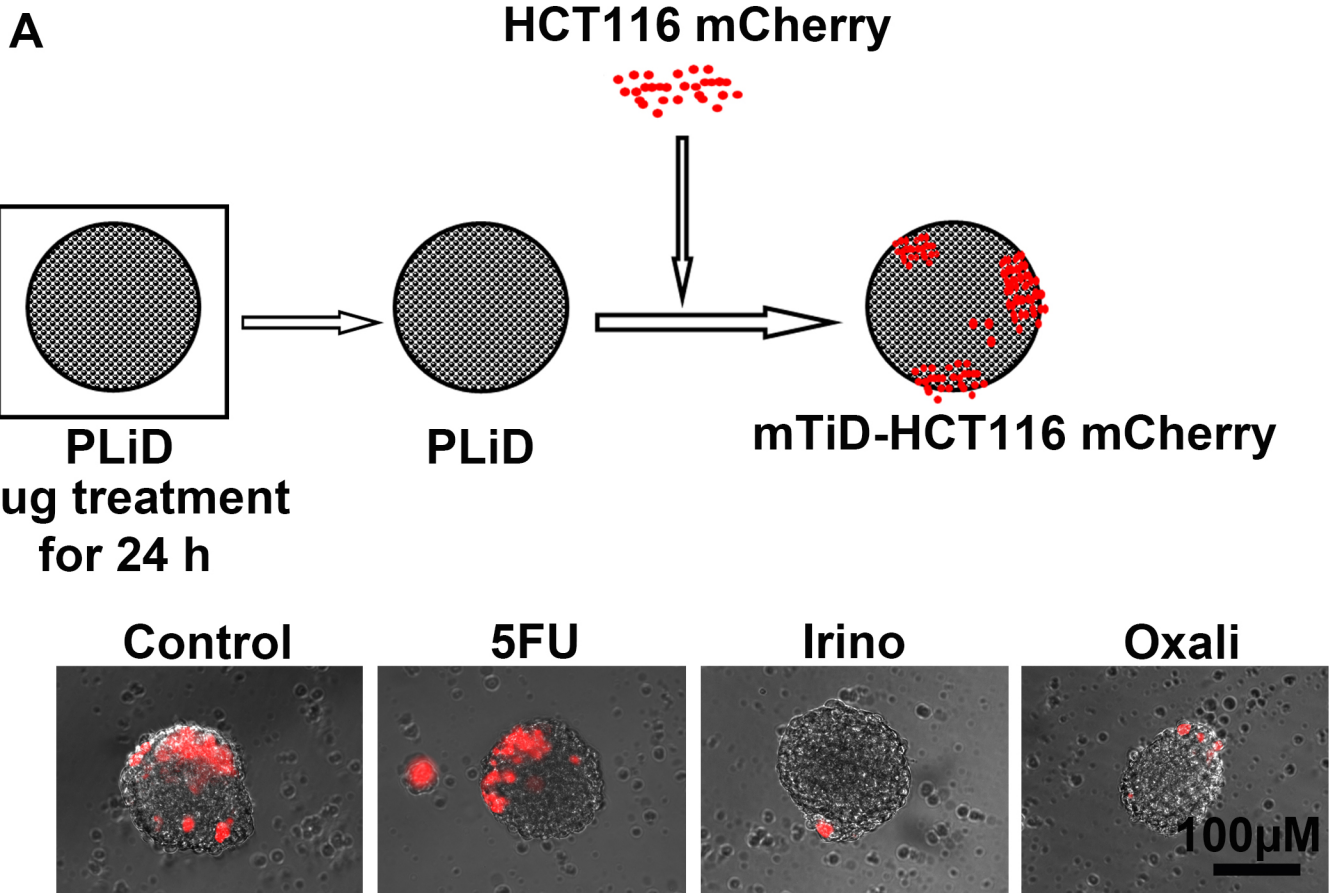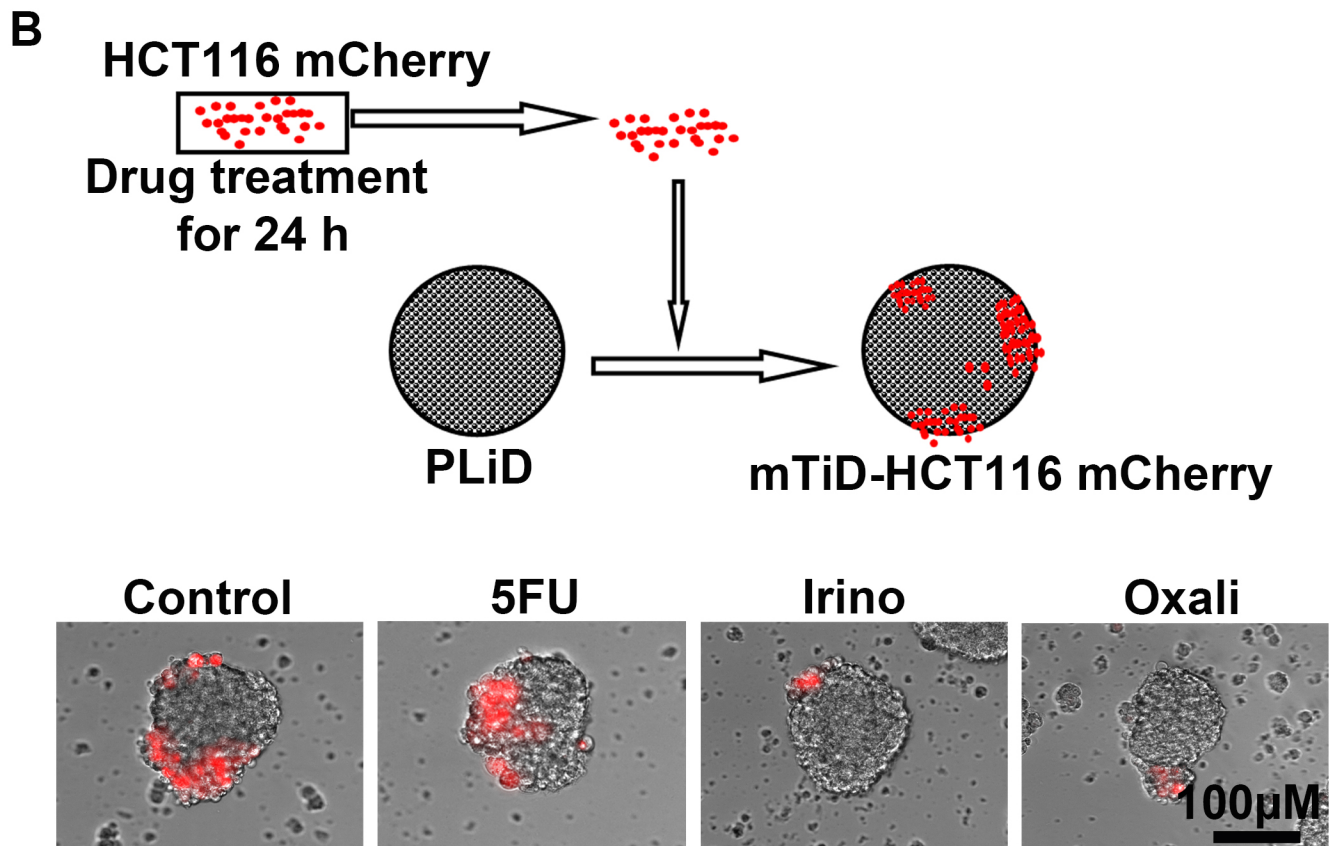

Supplement: NIHMS1519611-supplement-3.pdf [file NIHMS1519611-supplement-3.pdf]
